# Supplementary material for: Essential Oil Headspace Volatiles Prevent Invasive Box Tree Moth (Cydalima perspectalis) Oviposition—Insights from Electrophysiology and Behaviour
Source: PubMed Central journal article supplement (PMC7469176; doi:10.3390/insects11080465), 2020-07-23
Supplement: insects-11-00465-s001.pdf [file insects-11-00465-s001.pdf]

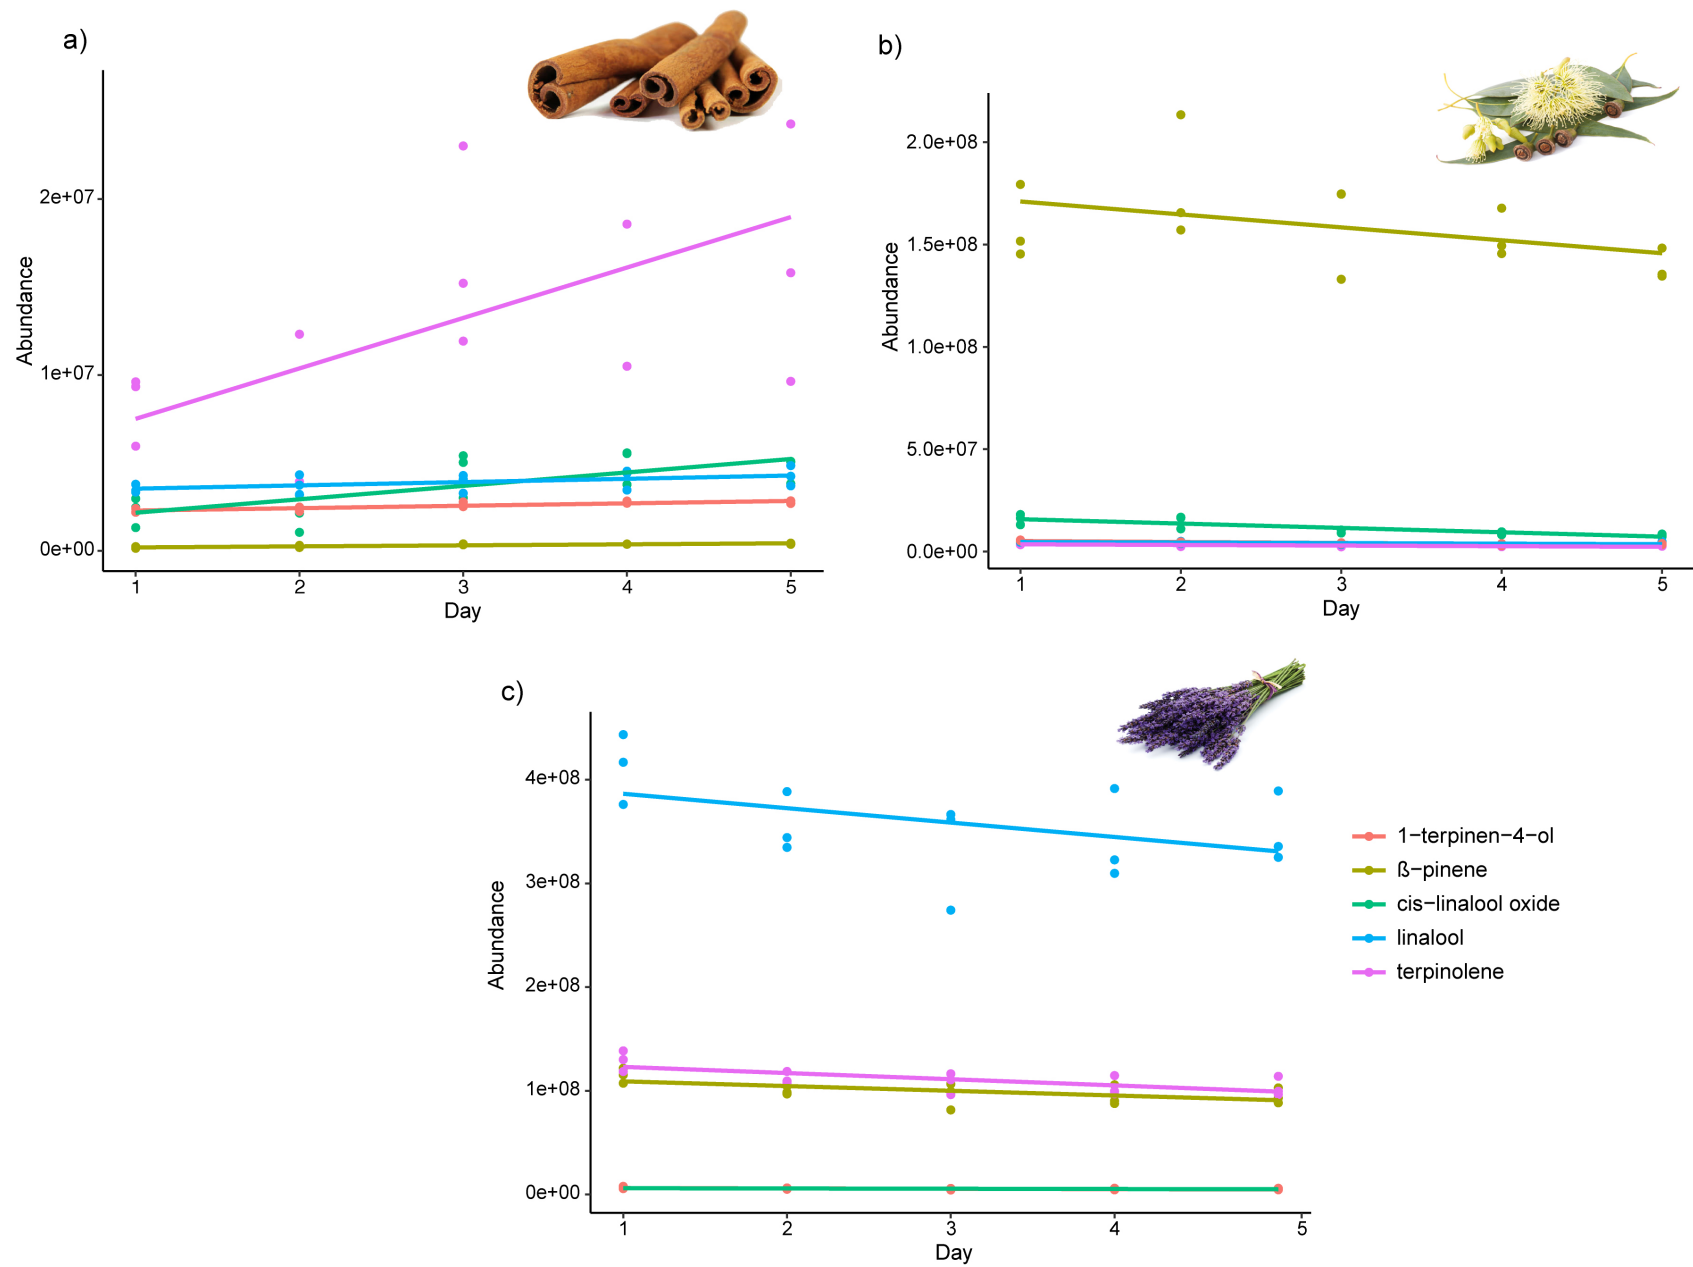

SFig.1. Evolution of the examined compounds over time in cinnamon (a), eucalyptus (b), and lavender (c). The fitted linear model shows trends for each of the compounds over time.

STable 1. Chemical composition of cinnamon, eucalyptus and lavender essential oils based on SPME headspace analysis

| #  | RT   | RI NIST | RI Cal. | ΔRI | CAS        | Compound                | Relative content (%) |            |          |
|----|------|---------|---------|-----|------------|-------------------------|----------------------|------------|----------|
|    |      |         |         |     |            |                         | Cinnamomum           | Eucalyptus | Lavender |
| 1  | 2,11 | 600     | 618     | 18  | 64-19-7    | acetic acid             | -                    | -          | 1,574    |
| 2  | 3,62 | 800     | 804     | 4   | 66-25-1    | hexanal                 | 0,119                | -          | -        |
| 3  | 4,33 | 855     | 856     | 1   | 6728-26-3  | trans-2-Hexenal         | 0,017                | -          | -        |
| 4  | 4,38 | 855     | 860     | 5   | 928-96-1   | cis-3-Hexen-1-ol        | -                    | -          | 0,028    |
| 5  | 4,49 | 868     | 868     | 0   | 100-41-4   | ethylbenzene            | 0,030                | -          | -        |
| 6  | 4,54 | 867     | 871     | 4   | 111-27-3   | 1-Hexanol               | -                    | -          | 0,076    |
| 7  | 5,01 | 898     | 905     | 7   | 100-42-5   | styrene                 | 1,231                | -          | -        |
| 8  | 5,59 | 948     | 943     | 5   | 80-56-8    | α-Pinene                | 1,642                | 8,310      | 4,916    |
| 9  | 5,83 | 952     | 959     | 7   | 79-92-5    | camphene                | 0,738                | 0,168      | 0,443    |
| 10 | 5,98 | 966     | 969     | 3   | 100-52-7   | benzaldehyde            | 8,226                | -          | -        |
| 11 | 6,20 | 977     | 983     | 6   | 3387-41-5  | sabinene                | -                    | -          | 0,135    |
| 12 | 6,34 | 975     | 993     | 18  | 106-68-3   | 3-Octanone              | -                    | -          | 0,632    |
| 13 | 6,27 | 980     | 988     | 8   | 127-91-3   | β-Pinene                | 0,200                | 1,541      | 6,704    |
| 14 | 6,30 | 988     | 990     | 2   | 110-93-0   | 6-methyl-5-hepten-2-one | 0,138                | -          | -        |
| 15 | 6,42 | 992     | 997     | 5   | 123-35-3   | β-Myrcene               | 0,462                | -          | -        |
| 16 | 6,55 | 1003    | 1006    | 3   | 271-89-6   | benzofuran              | 0,062                | -          | -        |
| 17 | 6,63 | 1006    | 1011    | 5   | 499-97-8   | p-Mentha-1(7),8-diene   | 0,016                | -          | -        |
| 18 | 6,68 | 1006    | 1014    | 8   | 99-83-2    | α-Phellandrene          | 7,562                | 0,196      | -        |
| 19 | 6,73 | 1007    | 1018    | 11  | 13466-78-9 | 3-Carene                | 0,011                | -          | -        |
| 20 | 6,77 | 1014    | 1020    | 6   | 142-92-7   | hexylacetate            | -                    | -          | 1,389    |
| 21 | 6,83 | 1017    | 1024    | 7   | 99-86-5    | α-Terpinene             | 0,012                | -          | -        |
| 22 | 6,98 | 1022    | 1034    | 12  | 99-87-6    | p-Cymene                | 10,522               | 1,024      | 0,025    |
| 23 | 7,03 | 1027    | 1037    | 10  | 138-86-3   | limonene                | 0,073                | 1,087      | 3,439    |
| 24 | 7,08 | 1033    | 1040    | 7   | 470-82-6   | eucalyptol              | 0,194                | 76,964     | 12,618   |
| 25 | 7,18 | 1031    | 1047    | 16  | 535-77-3   | m-Cymene                | 0,009                | -          | -        |
| 26 | 7,33 | 1037    | 1056    | 19  | 3338-55-4  | cis-β-Ocimene           | 1,495                | -          | 3,318    |
| 27 | 7,42 | 1057    | 1062    | 5   | 2548-87-0  | trans-2-Octenal         | 0,005                | -          | -        |

|    |      |      |      |    |            |                                         |       |       |        |
|----|------|------|------|----|------------|-----------------------------------------|-------|-------|--------|
| 28 | 7,48 | 1060 | 1066 | 6  | 99-85-4    | $\gamma$ -Terpinene                     | 0,153 | -     | 0,127  |
| 29 | 7,64 | 1060 | 1076 | 16 | 15537-55-0 | <i>cis</i> -Sabinene hydrate (4-Thuja   | -     | -     | 0,009  |
| 30 | 7,60 | 1066 | 1074 | 8  | 98-86-2    | acetophenone                            | 0,295 | 0,158 | -      |
| 31 | 7,74 | 1072 | 1083 | 11 | 34995-77-2 | <i>trans</i> -Linalool oxide (furanoid) | -     | -     | 0,370  |
| 32 | 7,69 | 1078 | 1080 | 2  | 5989-33-3  | <i>cis</i> -Linalool oxide              | 0,048 | 0,111 | 0,672  |
| 33 | 7,95 | 1090 | 1096 | 6  | 586-62-9   | terpinolene                             | 0,180 | 0,567 | 0,344  |
| 34 | 8,07 | 1100 | 1104 | 4  | 78-70-6    | linalool                                | 0,802 | 0,053 | 24,072 |
| 35 | 8,13 | 1102 | 1108 | 6  | 124-19-6   | nonanal                                 | 0,107 | -     | -      |
| 36 | 8,21 | 1103 | 1114 | 11 | 659-70-1   | isoamyl valerianate                     | -     | 0,665 | -      |
| 37 | 8,25 | 1095 | 1116 | 21 | nd         | $\alpha$ -Pinene epoxide                | -     | 0,045 | -      |
| 38 | 8,32 | 1114 | 1121 | 7  | 60-12-8    | phenylethyl Alcohol                     | 1,074 | -     | -      |
| 40 | 8,47 | 1123 | 1131 | 8  | 4864-61-3  | 3-Octylacetate                          | -     | -     | 0,087  |
| 41 | 8,58 | 1144 | 1138 | 6  | 7216-56-0  | (E,Z)-2,6-dimethyl-2,4,6-Octatr         | 0,006 | -     | 0,755  |
| 42 | 8,61 | 1150 | 1140 | 10 | 91819-58-8 | $\alpha$ -Campholenal                   | -     | 0,774 | -      |
| 43 | 8,66 | 1136 | 1143 | 7  | 586-82-3   | 3-Terpinen-1-ol                         | 0,184 | -     | -      |
| 44 | 8,71 | 1145 | 1147 | 2  | 13837-75-7 | <i>cis</i> -Limonene-oxide              | -     | 1,280 | -      |
| 45 | 8,77 | 1143 | 1151 | 8  | 4959-35-7  | <i>trans</i> -Limonene-oxide            | -     | 0,616 | -      |
| 46 | 8,78 | 1132 | 1151 | 19 | 57396-75-5 | 3,4-Dimethyl-2,4,6-octatriene           | 0,034 | -     | 0,072  |
| 47 | 8,82 | 1143 | 1154 | 11 | 138-87-4   | $\beta$ -Terpineol                      | 0,077 | -     | -      |
| 48 | 8,84 | 1140 | 1155 | 15 | 547-61-5   | <i>trans</i> -Pinocarveol               | -     | 0,409 | -      |
| 49 | 8,88 | 1144 | 1158 | 14 | 473-67-6   | verbenol                                | -     | 0,145 | -      |
| 50 | 8,94 | 1144 | 1162 | 18 | 464-49-3   | (+)-Camphor                             | 0,262 | -     | 11,701 |
| 51 | 9,07 | 1160 | 1170 | 10 | 104-53-0   | benzenepropanal                         | 2,068 | -     | -      |
| 52 | 9,14 | 1159 | 1175 | 16 | 547-60-4   | pinocamphone                            | -     | 0,159 | -      |
| 53 | 9,16 | 1165 | 1176 | 11 | 498-16-8   | (-)-Lavandulol                          | -     | -     | 0,058  |
| 54 | 9,17 | 1161 | 1177 | 16 | 30460-92-5 | pinocarvone                             | -     | 0,423 | -      |
| 55 | 9,22 | 1169 | 1180 | 11 | 507-70-0   | borneol                                 | 0,496 | -     | 2,145  |
| 56 | 9,40 | 1177 | 1192 | 15 | 562-74-3   | 1-Terpinen-4-ol                         | 0,978 | 0,065 | 0,387  |
| 57 | 9,49 | 1186 | 1198 | 12 | 500-02-7   | crypton                                 | -     | 0,309 | 0,034  |
| 58 | 9,48 | 1189 | 1197 | 8  | 98-55-5    | $\alpha$ -Terpineol                     | 0,554 | -     | -      |

|    |       |      |      |    |            |                                                |        |       |        |
|----|-------|------|------|----|------------|------------------------------------------------|--------|-------|--------|
| 59 | 9,44  | 1190 | 1194 | 4  | nd         | <i>n</i> -Hexylbutyrate                        | -      | -     | 0,937  |
| 61 | 9,52  | 1200 | 1200 | 0  | 112-40-3   | dodecane                                       | 0,044  | -     | -      |
| 62 | 9,54  | 1189 | 1201 | 12 | 98-55-5    | $\alpha$ -Terpineol                            | -      | 1,467 | 0,168  |
| 63 | 9,60  | 1194 | 1205 | 11 | 515-00-4   | myrtenol                                       | -      | 0,377 | -      |
| 64 | 9,63  | 1205 | 1208 | 3  | 112-31-2   | decanal                                        | 0,133  | -     | -      |
| 65 | 9,64  | 1194 | 1208 | 14 | 564-94-3   | myrtenal                                       | -      | 0,290 | -      |
| 66 | 9,76  | 1200 | 1217 | 17 | 5948-04-09 | <i>trans</i> -Dihydrocarvone                   | -      | 0,028 | -      |
| 67 | 9,84  | 1206 | 1223 | 17 | 80-57-9    | verbenone                                      | -      | 0,396 | -      |
| 68 | 9,92  | 1214 | 1229 | 15 | 1197-07-5  | <i>trans</i> -Carveol                          | -      | 0,536 | 0,007  |
| 69 | 9,95  | 1229 | 1230 | 1  | 18679-48-6 | 1,8-epoxy- <i>p</i> -Menthan-2-ol              | -      | 0,028 | -      |
| 70 | 10,05 | 1239 | 1238 | 1  | 106-25-2   | nerol                                          | -      | -     | 0,051  |
| 71 | 10,09 | 1226 | 1241 | 15 | 1197-06-4  | <i>cis</i> -Carveol                            | -      | 0,041 | -      |
| 72 | 10,11 | 1222 | 1242 | 20 | 125-12-2   | isobornylacetate                               | -      | -     | 0,115  |
| 73 | 10,15 | 1241 | 1245 | 4  | 10632-13-0 | hexyl isovalerate                              | -      | -     | 0,061  |
| 74 | 10,24 | 1239 | 1252 | 13 | 122-03-2   | cumic aldehyde                                 | 0,052  | 0,083 | -      |
| 75 | 10,25 | 1258 | 1252 | 6  | 135-02-4   | 2-Anisaldehyde                                 | 1,876  | -     | -      |
| 76 | 10,31 | 1254 | 1256 | 2  | 99-49-0    | carvone                                        | -      | 0,661 | -      |
| 77 | 10,32 | 1244 | 1257 | 13 | 499-71-8   | carvotanacetone                                | -      | 0,052 | -      |
| 78 | 10,42 | 1256 | 1264 | 8  | 103-45-7   | 2-Phenethyl acetate                            | 0,383  | -     | -      |
| 79 | 10,47 | 1257 | 1268 | 11 | 115-95-7   | linalyl acetate                                | -      | -     | 11,760 |
| 81 | 10,65 | 1260 | 1280 | 20 | 5392-40-5  | citral                                         | -      | -     | 0,007  |
| 82 | 10,80 | 1283 | 1291 | 8  | 14371-10-9 | <i>trans</i> -Cinnamaldehyde                   | 49,818 | 0,040 | 0,005  |
| 83 | 10,85 | 1289 | 1295 | 6  | 104-46-1   | anethole                                       | 0,523  | -     | -      |
| 84 | 10,86 | 1292 | 1295 | 3  | 20777-39-3 | lavandulyl acetate                             | -      | -     | 0,234  |
| 85 | 10,89 | 1289 | 1298 | 9  | 76-49-3    | bornyl acetate                                 | -      | -     | 0,036  |
| 86 | 10,91 | 1285 | 1299 | 14 | 5655-61-8  | (-)-Bornyl acetate                             | 0,133  | -     | -      |
| 87 | 10,92 | 1295 | 1300 | 5  | 536-59-4   | <i>p</i> -Mentha-1,8-dien-7-ol                 | -      | 0,017 | -      |
| 88 | 10,92 | 1300 | 1300 | 0  | 629-50-5   | tridecane                                      | -      | 0,030 | -      |
| 89 | 11,03 | 1300 | 1308 | 8  | 105-86-2   | geranylformate                                 | -      | -     | 0,005  |
| 90 | 11,53 | 1342 | 1346 | 4  | 1946-00-5  | <i>trans</i> -8- <i>p</i> -Menthadien-1,2-diol | -      | 0,018 | -      |

|     |       |      |      |    |            |                                      |       |       |       |
|-----|-------|------|------|----|------------|--------------------------------------|-------|-------|-------|
| 91  | 11,66 | 1355 | 1356 | 1  | 64142-78-5 | 8-hydroxylinalool                    | -     | -     | 0,007 |
| 92  | 11,72 | 1350 | 1361 | 11 | 80-26-2    | $\alpha$ -Terpinyl acetate           | -     | 0,028 | 0,107 |
| 93  | 11,77 | 1351 | 1364 | 13 | 17699-14-8 | $\alpha$ -Cubebene                   | 0,015 | -     | 0,003 |
| 94  | 11,84 | 1362 | 1370 | 8  | 141-12-8   | neryl acetate                        | -     | 0,002 | 1,852 |
| 95  | 11,80 | 1359 | 1367 | 8  | 97-53-0    | eugenol                              | 0,013 | -     | -     |
| 96  | 11,84 | 1402 | 1370 | 32 | 475-20-7   | longifolene                          | 0,010 | -     | -     |
| 97  | 12,03 | 1370 | 1384 | 14 | 22469-52-9 | cyclosativene                        | 0,256 | -     | -     |
| 98  | 12,08 | 1372 | 1388 | 16 | 14912-44-8 | ylangene                             | 0,145 | 0,034 | -     |
| 99  | 12,11 | 1386 | 1390 | 4  | 105-87-3   | geranylacetate                       | -     | -     | 2,910 |
| 101 | 12,15 | 1376 | 1393 | 17 | 3856-25-5  | $\alpha$ -Copaene                    | 2,013 | -     | 0,014 |
| 102 | 12,28 | 1384 | 1403 | 19 | 5208-59-3  | $\beta$ -Bourbonene                  | 0,072 | -     | 0,012 |
| 103 | 12,30 | 1391 | 1405 | 14 | 515-13-9   | $\beta$ -Elemene                     | 0,049 | 0,005 | -     |
| 104 | 12,43 | 1396 | 1415 | 19 | 3650-28-0  | (+)-Sativene                         | 0,037 | -     | -     |
| 105 | 12,47 | 1428 | 1418 | 10 | 13474-59-4 | <i>trans</i> - $\alpha$ -Bergamotene | -     | -     | 0,009 |
| 106 | 12,59 | 1408 | 1428 | 20 | 469-61-4   | $\alpha$ -cedrene                    | 0,071 | -     | -     |
| 107 | 12,71 | 1420 | 1437 | 17 | 512-61-8   | $\alpha$ -santalene                  | -     | -     | 0,026 |
| 108 | 12,74 | 1444 | 1440 | 4  | 87-44-5    | $\beta$ -Caryophyllene               | 0,183 | 0,018 | 1,626 |
| 109 | 12,85 | 1476 | 1448 | 28 | 495-60-3   | $\alpha$ -Zingiberene                | 0,145 | -     | -     |
| 110 | 12,92 | 1452 | 1454 | 2  | 103-54-8   | cinnamyl acetate                     | 1,042 | -     | -     |
| 111 | 12,94 | 1440 | 1456 | 16 | 17334-55-3 | $\beta$ -Gurjunene                   | -     | 0,019 | -     |
| 112 | 12,99 | 1440 | 1459 | 19 | 489-39-4   | aromadendrene                        | 0,106 | 0,391 | -     |
| 113 | 13,06 | 1443 | 1465 | 22 | 28973-97-9 | <i>cis</i> - $\beta$ -farnesane      | -     | -     | 0,032 |
| 114 | 13,20 | 1456 | 1476 | 20 | 6753-98-6  | $\alpha$ -Humulene                   | -     | -     | 0,014 |
| 115 | 13,27 | 1467 | 1481 | 14 | 25246-27-9 | alloaromadendrene                    | 0,141 | 0,033 | -     |
| 116 | 13,42 | 1476 | 1493 | 17 | 30021-74-0 | $\gamma$ -Muurolene                  | 0,252 | -     | -     |
| 117 | 13,59 | 1495 | 1507 | 12 | 88-84-6    | $\beta$ -Guaiene                     | 0,020 | -     | -     |
| 118 | 13,61 | 1490 | 1509 | 19 | 17066-67-0 | eudesma-4(14),11-diene               | -     | 0,005 | -     |
| 119 | 13,64 | 1507 | 1512 | 5  | 39029-41-9 | $\gamma$ -Cadinene                   | 0,008 | -     | -     |
| 120 | 13,67 | nd   | 1514 | -  | 2306-78-7  | nerolidyl acetate                    | -     | -     | 0,004 |
| 122 | 13,69 | 1497 | 1516 | 19 | 31983-22-9 | $\alpha$ -Muurolene                  | 0,103 | -     | -     |

|              |       |      |      |    |             |                                                           |               |               |               |
|--------------|-------|------|------|----|-------------|-----------------------------------------------------------|---------------|---------------|---------------|
| 123          | 13,70 | 1500 | 1517 | 17 | nd          | linalyl isovalerate                                       | -             | -             | 0,001         |
| 124          | 13,74 | 1508 | 1520 | 12 | 495-61-4    | $\beta$ -Bisabolene                                       | 0,075         | -             | -             |
| 125          | 13,77 | 1533 | 1522 | 11 | 128-37-0    | butylated hydroxytoluene                                  | -             | 0,045         | -             |
| 126          | 13,92 | 1534 | 1535 | 1  | 39029-41-9  | $\gamma$ -Cadinene                                        | -             | -             | 0,011         |
| 127          | 13,98 | 1523 | 1539 | 16 | 483-76-1    | $\delta$ -Cadinene                                        | 0,126         | -             | -             |
| 128          | 14,02 | 1543 | 1543 | 0  | 483-77-2    | calamenene                                                | -             | 0,001         | -             |
| 129          | 14,03 | 1536 | 1544 | 8  | 1963-36-6   | 4-Methoxycinnamaldehyde                                   | 0,469         | -             | -             |
| 130          | 14,70 | 1600 | 1600 | 0  | 544-76-3    | hexadecane                                                | -             | 0,003         | -             |
| 131          | 14,80 | 1613 | 1609 | 4  | 1139-30-6   | caryophyllene oxide                                       | -             | -             | 0,006         |
| 132          | 14,81 | 1584 | 1609 | 25 | 51371-47-2  | globulol                                                  | -             | 0,002         | -             |
| 133          | 15,22 | 1635 | 1645 | 10 | 14035-34-8  | 2,6-Bis(1,1-dimethylethyl)-4-(1-oxopropyl)phenol          | -             | 0,003         | -             |
| 134          | 15,28 | n.a. | 1650 | -  | 121917-12-2 | Endo-2,3-di(methoxycarbonyl)-benzo[e]bicyclo[2.2.2]octane | -             | 0,004         | -             |
| 135          | 15,81 | 1677 | 1696 | 19 | 483-78-3    | cadalene                                                  | -             | 0,002         | -             |
| 136          | 15,83 | 1700 | 1698 | 2  | 629-78-7    | heptadecane                                               | -             | 0,004         | -             |
| <b>Total</b> |       |      |      |    |             |                                                           | <b>98,392</b> | <b>99,729</b> | <b>96,152</b> |
